# Supplementary material for: Mutations in bassoon in individuals with familial and sporadic progressive supranuclear palsy-like syndrome
Source: Springer Nature journal article supplement (doi:10.1038/s41598-018-19198-0), 2018-01-10
Supplement: MOESM1 [file 41598_2018_19198_MOESM1_ESM.pdf]

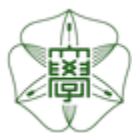

|                        |                                                                                                                                                                                                                                                                                                                                                                                                                                                        |
|------------------------|--------------------------------------------------------------------------------------------------------------------------------------------------------------------------------------------------------------------------------------------------------------------------------------------------------------------------------------------------------------------------------------------------------------------------------------------------------|
| Title                  | Mutations in bassoon in individuals with familial and sporadic progressive supranuclear palsy-like syndrome                                                                                                                                                                                                                                                                                                                                            |
| Author(s)              | Yabe, Ichiro; Yaguchi, Hiroaki; Kato, Yasutaka; Miki, Yasuo; Takahashi, Hidehisa; Tanikawa, Satoshi; Shirai, Shinichi; Takahashi, Ikuko; Kimura, Mari; Hama, Yuka; Matsushima, Masaaki; Fujioka, Shinsuke; Kano, Takahiro; Watanabe, Masashi; Nakagawa, Shin; Kunieda, Yasuyuki; Ikeda, Yoshio; Hasegawa, Masato; Nishihara, Hiroshi; Ohtsuka, Toshihisa; Tanaka, Shinya; Tsuboi, Yoshio; Hatakeyama, Shigetsugu; Wakabayashi, Koichi; Sasaki, Hidenao |
| Citation               | Scientific Reports, 8, 819<br><a href="https://doi.org/10.1038/s41598-018-19198-0">https://doi.org/10.1038/s41598-018-19198-0</a>                                                                                                                                                                                                                                                                                                                      |
| Issue Date             | 2018-01-16                                                                                                                                                                                                                                                                                                                                                                                                                                             |
| Doc URL                | <a href="http://hdl.handle.net/2115/68138">http://hdl.handle.net/2115/68138</a>                                                                                                                                                                                                                                                                                                                                                                        |
| Rights(URL)            | <a href="http://creativecommons.org/licenses/by/4.0/">http://creativecommons.org/licenses/by/4.0/</a>                                                                                                                                                                                                                                                                                                                                                  |
| Type                   | article                                                                                                                                                                                                                                                                                                                                                                                                                                                |
| Additional Information | There are other files related to this item in HUSCAP. Check the above URL.                                                                                                                                                                                                                                                                                                                                                                             |
| File Information       | 41598_2018_19198_MOESM1_ESM.pdf (Supplementary data)                                                                                                                                                                                                                                                                                                                                                                                                   |

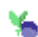

[Instructions for use](#)

## **Supplementary Information**

### **Mutations in bassoon in individuals with familial and sporadic progressive supranuclear palsy-like syndrome**

Ichiro Yabe<sup>1\*</sup>, Hiroaki Yaguchi<sup>1,4</sup>, Yasutaka Kato<sup>2,11</sup>, Yasuo Miki<sup>3</sup>, Hidehisa Takahashi<sup>4</sup>, Satoshi Tanikawa<sup>2</sup>, Shinichi Shirai<sup>1</sup>, Ikuko Takahashi<sup>1</sup>, Mari Kimura<sup>1</sup>, Yuka Hama<sup>1</sup>, Masaaki Matsushima<sup>1</sup>, Shinsuke Fujioka<sup>5</sup>, Takahiro Kano<sup>1</sup>, Masashi Watanabe<sup>4</sup>, Shin Nakagawa<sup>6</sup>, Yasuyuki Kunieda<sup>7</sup>, Yoshio Ikeda<sup>8</sup>, Masato Hasegawa<sup>9</sup>, Hiroshi Nishihara<sup>2,12</sup>, Toshihisa Ohtsuka<sup>10</sup>, Shinya Tanaka<sup>2,13</sup>, Yoshio Tsuboi<sup>5</sup>, Shigetsugu Hatakeyama<sup>4</sup>, Koichi Wakabayashi<sup>3</sup>, Hidenao Sasaki<sup>1</sup>

1. Department of Neurology, Faculty of Medicine and Graduate School of Medicine, Hokkaido University, Sapporo, Japan
2. Department of Cancer Pathology, Faculty of Medicine and Graduate School of Medicine, Hokkaido University, Sapporo, Japan
3. Department of Neuropathology, Hirosaki University Graduate School of Medicine, Hirosaki, Japan
4. Department of Biochemistry, Faculty of Medicine and Graduate School of Medicine, Hokkaido University, Sapporo, Japan
5. Department of Neurology, Fukuoka University School of Medicine, Fukuoka, Japan
6. Department of Psychiatry, Faculty of Medicine and Graduate School of Medicine, Hokkaido University, Sapporo, Japan
7. Wakkanai City Hospital, Wakkanai, Japan
8. Department of Neurology, Gunma University Graduate School of Medicine, Maebashi,

Japan

9. Department of Dementia and Higher Brain Function, Tokyo Metropolitan Institute of Medical Science, Tokyo, Japan
10. Department of Biochemistry, Faculty of Medicine / Graduate School of Medicine, University of Yamanashi, Chuo, Japan
11. Laboratory of Oncology, Hokuto Hospital, Obihiro, Japan
12. Division of Clinical Cancer Genomics, Cancer Center, Keio University School of Medicine, Tokyo, Japan
13. Global Station for Soft Matter, Global Institution for Collaborative Research and Education, Hokkaido University, Sapporo, Japan

\*Correspondence to [yabe@med.hokudai.ac.jp](mailto:yabe@med.hokudai.ac.jp)

Table of contents

Supplemental Fig. S1. Co-localization of three-repeat tau and four-repeat tau in neurofibrillary tangles in the dentate gyrus

Supplemental Fig. S2. Western blot analysis of tau in a freshly frozen sample of the frontal cortex

Supplemental Fig. S3. Western blot analysis of BSN in a freshly frozen sample of the frontal cortex

Supplemental Fig. S4. Western blot tau analysis of a fresh frozen sample of frontal cortex from Case2 compared with a normal control brain

Supplemental Fig. S5. Western blot analysis of tau and wild-type BSN (BSN[Wt]) or mutated BSN (BSN[Mut])

Supplemental Fig. S6. Raw blot images of figures

Supplemental Table S1. Sixty-seven candidate genes

Supplemental Table S2. Primary antibodies used in this study

Supplemental Table S3. Primers used in this study

Supplemental Table S4. PCR method used in this study

Supplemental Table S5. PCR primers for mutated rat bassoon cDNA

**Supplemental Fig. S1.**

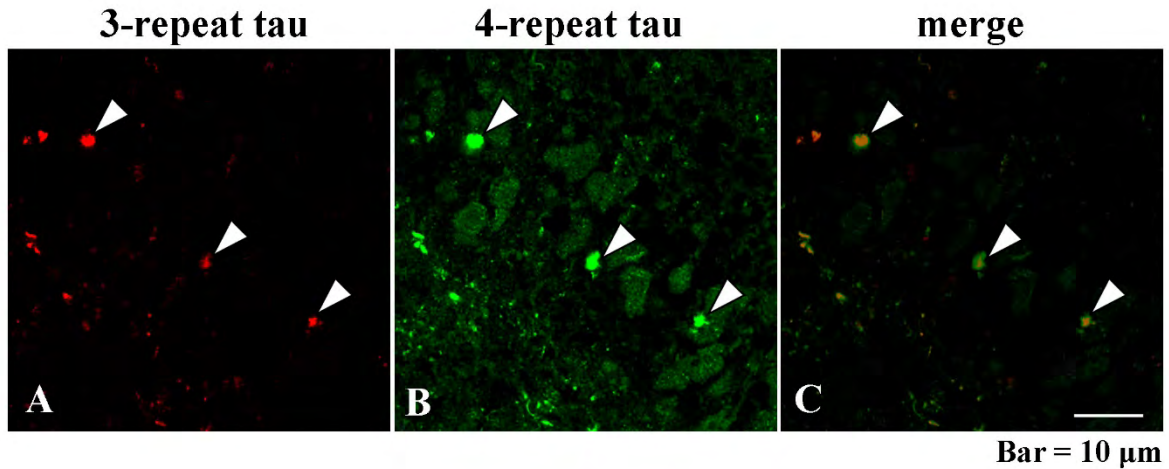

**Supplemental Fig. S1. Co-localization of three-repeat tau and four-repeat tau in neurofibrillary tangles in the dentate gyrus**

Double-labeling immunofluorescence demonstrating the co-localization of three-repeat tau and four-repeat tau in neurofibrillary tangles in the dentate gyrus (arrowheads) (A-C). Three-repeat tau appears *red*, and four-repeat-tau appears *green*. Bar = 10 μm.

## Supplemental Fig. S2

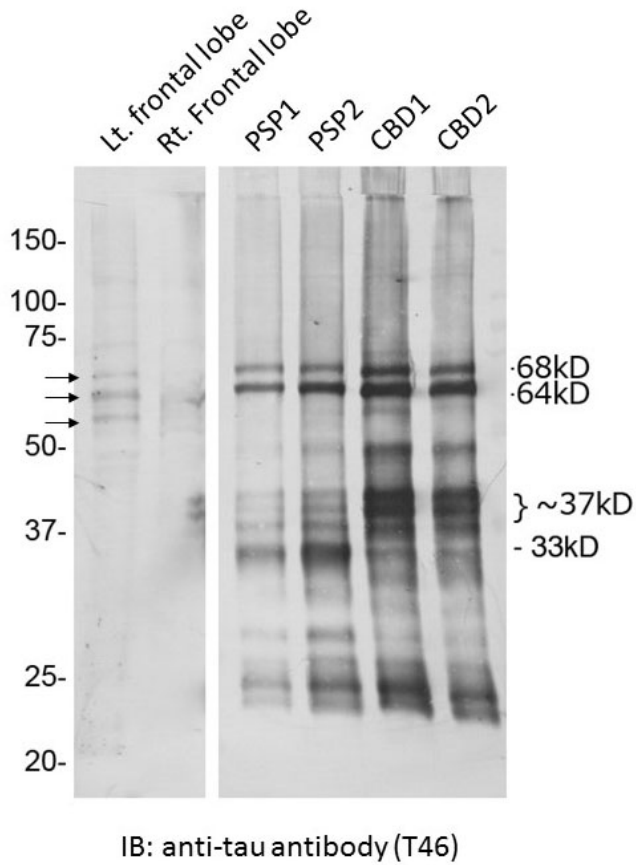

### Supplemental Fig. S2. Western blot analysis of tau in a freshly frozen sample of the frontal cortex.

Western blot analysis of tau, performed according to a previously reported method<sup>1</sup>, revealed phosphorylated triplet tau bands (60, 64, and 68 kDa) (arrow) that were similar to those observed in Alzheimer's disease. From left to right: left frontal lobe and right frontal lobe of case 2 and 4 disease controls (2 PSP and 2 CBD cases).

**Supplemental Fig. S3**

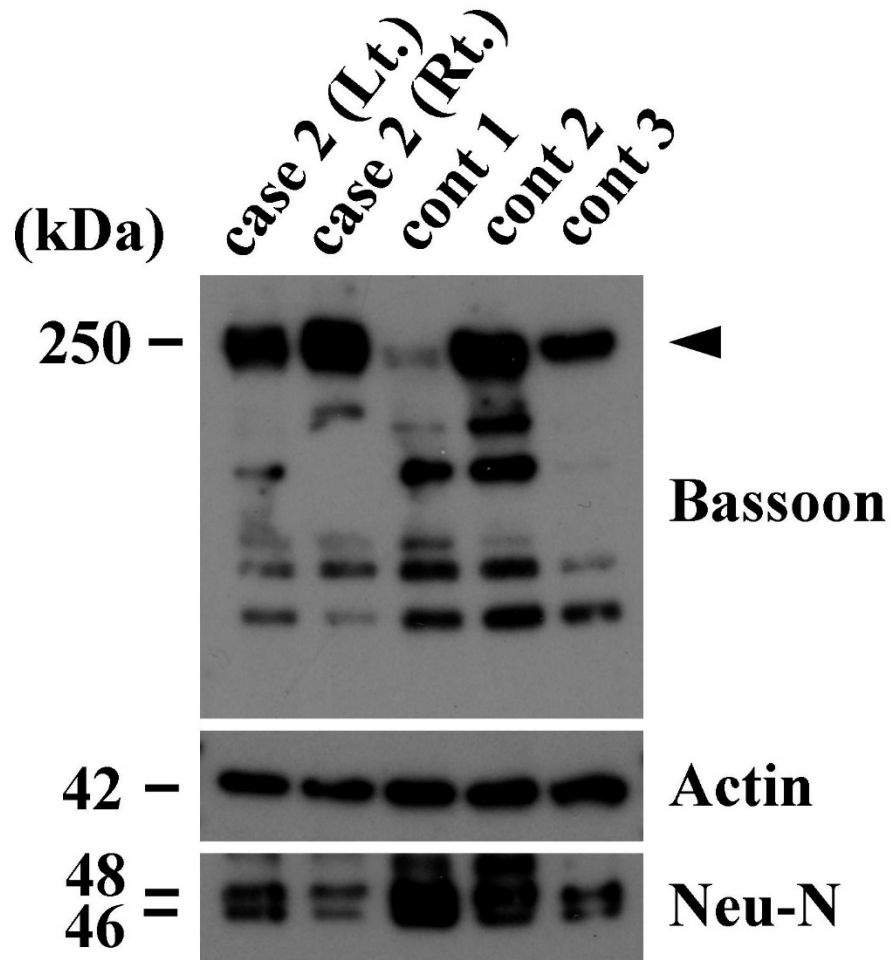

**Supplemental Fig. S3. Western blot analysis of BSN in a freshly frozen sample of the frontal cortex.**

Western blot analysis of the BSN protein using a BSN antibody (SAP7F407; Abcam, Cambridge, UK; 1:150) did not reveal a decrease in this patient. From left to right: left (Lt) frontal lobe and right (Rt) frontal lobe of case 2 and 3 disease controls (cont 1-3). Western blot analysis was performed according to a previously reported method<sup>2</sup>.

## Supplemental Fig. S4

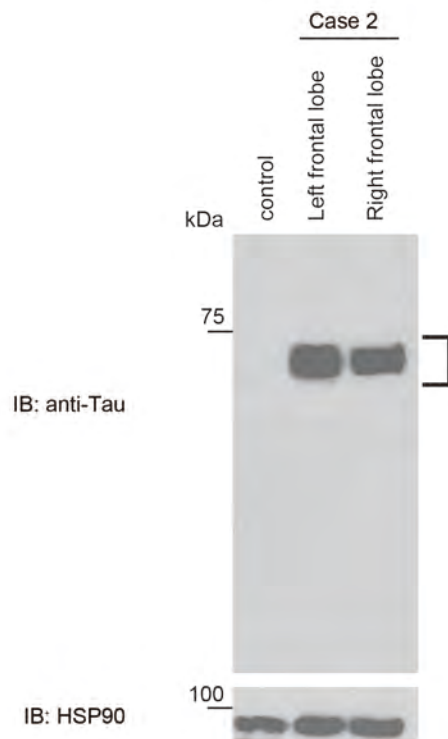

**Supplemental Fig. S4. Western blot tau analysis of a fresh frozen sample of frontal cortex from Case2 compared with a normal control brain.**

Western blot analysis of tau, compared with a normal control brain, revealed an accumulation of tau bands in the brain of case 2. HSP90 was used as an internal control.

Supplemental Fig. S5

**A**

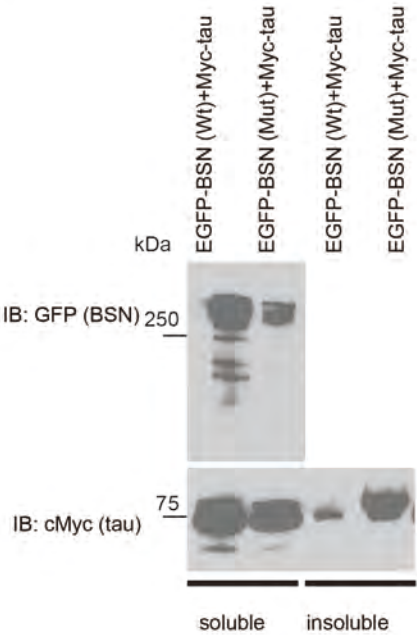

**B**

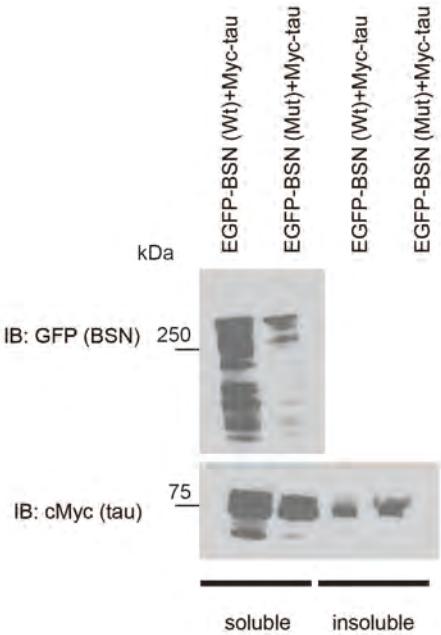

**C**

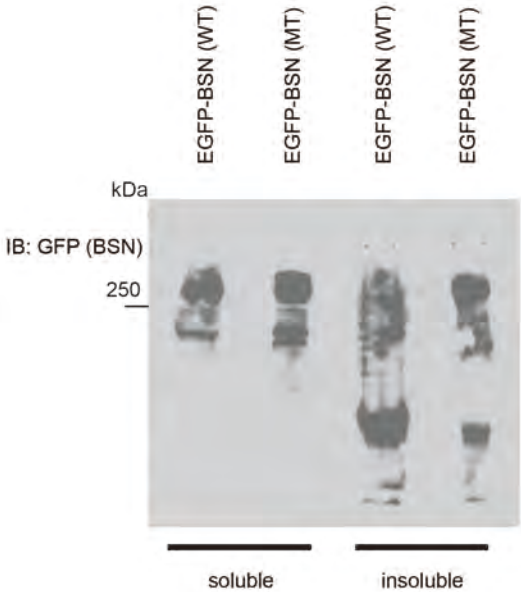

**D**

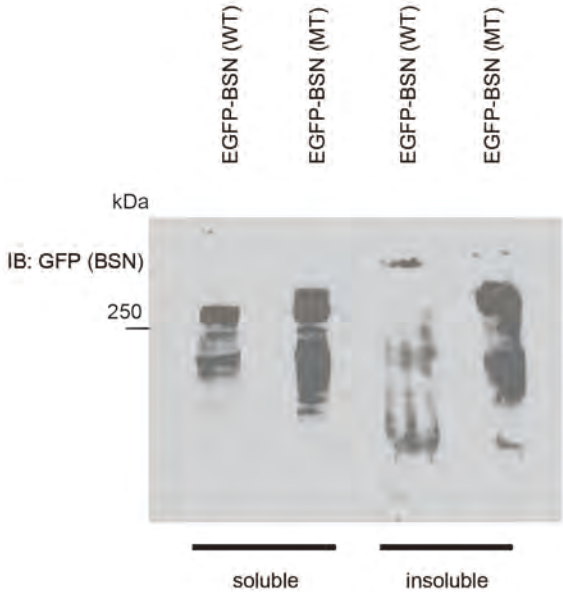

**Supplemental Fig. S5. Western blot analysis of tau and wild-type BSN (BSN[Wt]) or mutated BSN (BSN[Mut]).**

(A and B) Protein assay of tau following overexpression of BSN(Wt) or BSN(Mut). HEK293T cells overexpressing cMyc-tagged tau and EGFP-tagged BSN(Wt), and cMyc-tagged tau and EGFP-tagged BSN(Mut) were used. Western blot analysis of tau with cMyc-tagged tau and EGFP-tagged BSN(Mt), compared with HEK293T cells overexpressing cMyc-tagged tau and EGFP-tagged BSN(Wt), revealed the reduced accumulation of tau bands in the insoluble fraction. In this study, tau protein with 4 repeats was used.

(C and D) HEK293T cells overexpressing EGFP-tagged BSN(Wt) and EGFP-tagged BSN(Mut) were used. Western blot analysis of BSN(Mut) compared with BSN(Wt) showed the accumulation of BSN in the insoluble fraction.

## Supplemental Fig. S6

A)

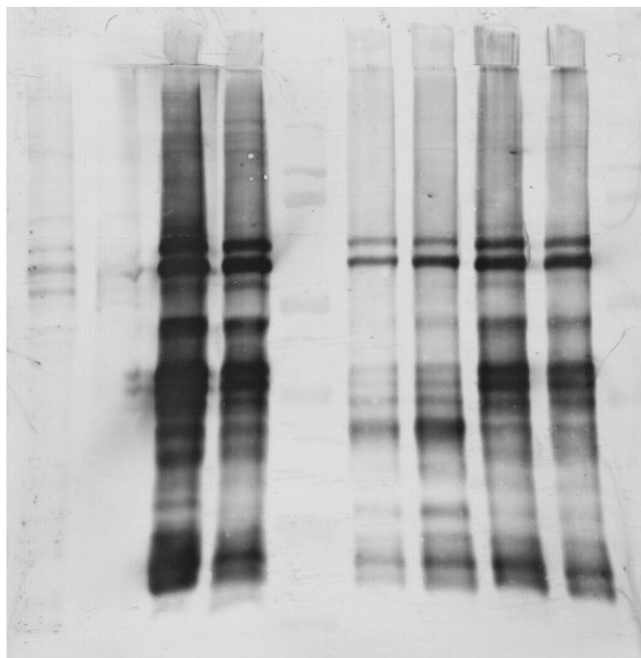

2016.7.9

11

top  
BASIC COX.  
200

4ul

← BSA  
(ALBUMIN)  
X10K  
MORSE.  
CRISOLAD

0

top  
BASIC  
200

← MEM-A/  
X10K  
MORSE  
CRISOLAD

actin →  
X10K  
Bb  
CRISOLAD

C)

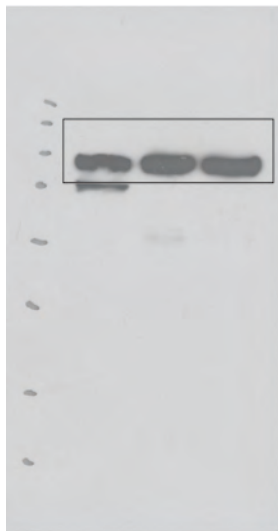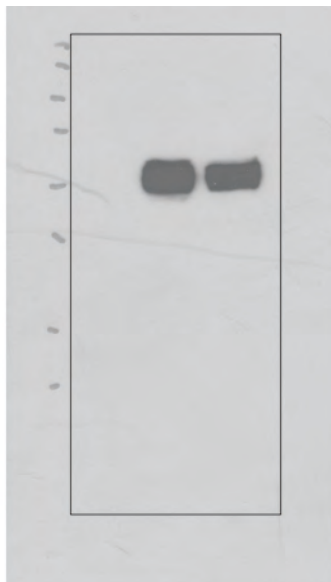

D)

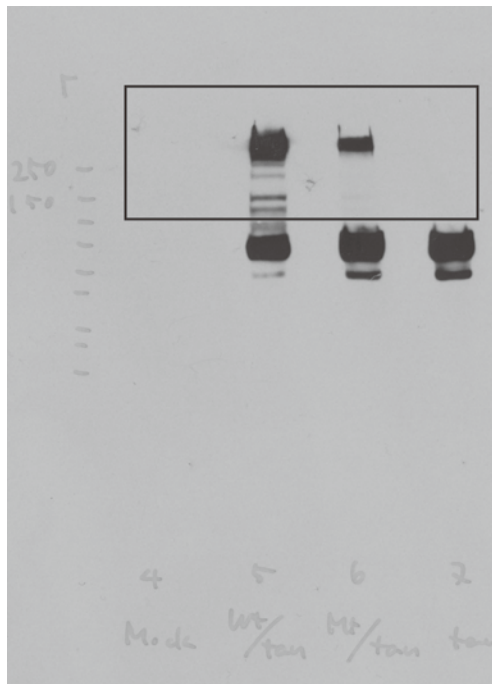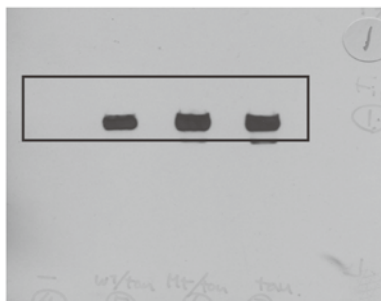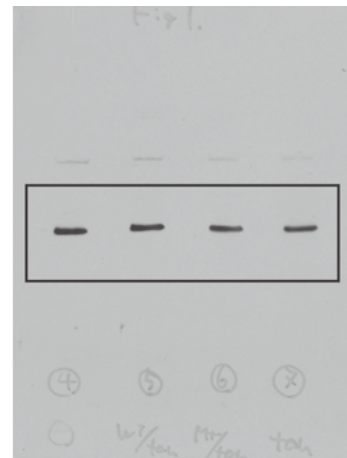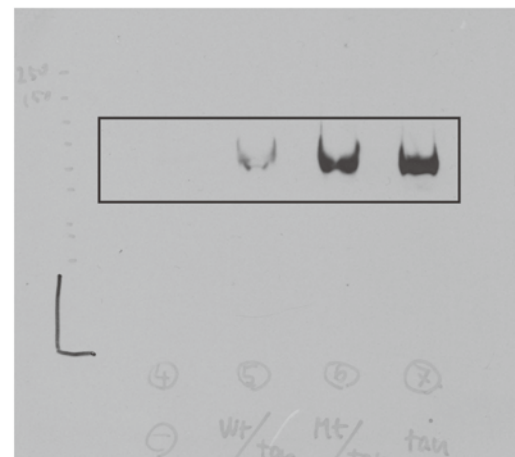

**E)**

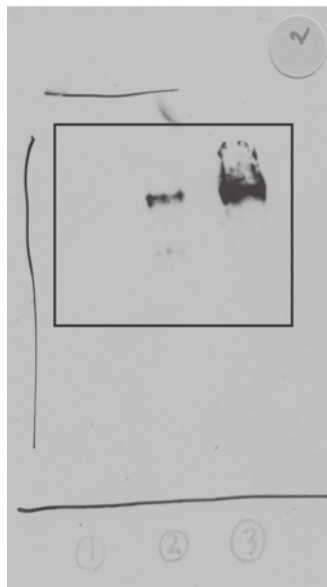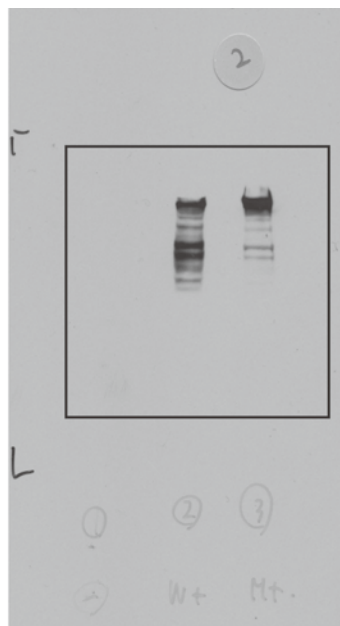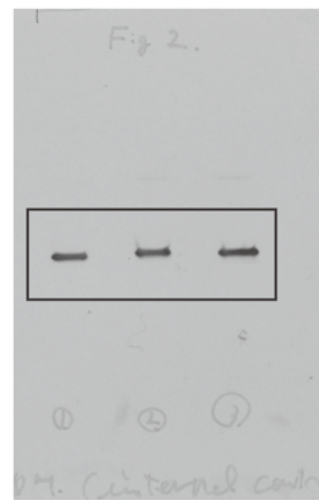

F)

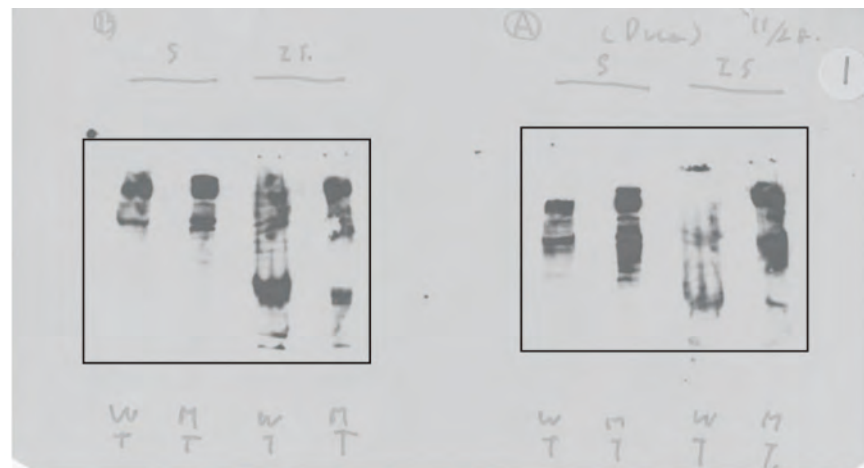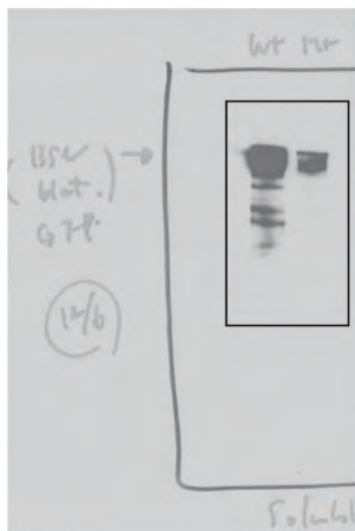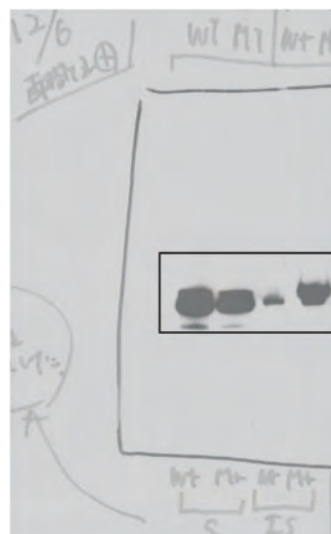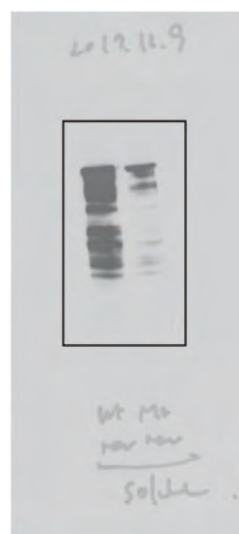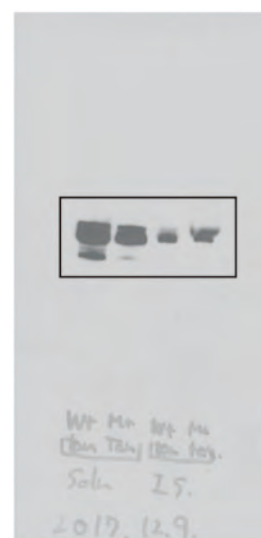

**Supplemental Fig. S6. Raw blot images of figures.**

A) Raw blot image of supplemental Fig. S2

The grouping of blots cropped from different parts of the same blots and same exposure.

B) Raw blot image of supplemental Fig. S3

The grouping of blots cropped from different parts of the same blots and same exposure.

C) Raw blot images of supplemental Fig. S4

The grouping of blots cropped from different parts of the different gel and different exposure.

D) Raw blot images of Fig. 3A and B

The grouping of blots cropped from different parts of the different gel and different exposure.

E) Raw blot images of Fig. 3C and D

The grouping of blots cropped from different parts of the different gel and different exposure.

F) Raw blot images of Fig. 3C and supplemental Fig. S5

The grouping of blots cropped from different parts of different gels and different exposures.

**Supplemental Table S1. Sixty-seven candidate genes.**

| No | Gene                         |
|----|------------------------------|
| 1  | <i>SLC35E2,RP1-283E3.8</i>   |
| 2  | <i>AGO3,RP4-665N4.8</i>      |
| 3  | <i>ADAR</i>                  |
| 4  | <i>DYSF</i>                  |
| 5  | <i>ANKRD36</i>               |
| 6  | <i>SEPT10,SOWAHC</i>         |
| 7  | <i>ORC4</i>                  |
| 8  | <i>CSRNP3</i>                |
| 9  | <i>STT3B</i>                 |
| 10 | <i>TMEM158</i>               |
| 11 | <i>MAP4</i>                  |
| 12 | <i>COL7A1</i>                |
| 13 | <i>NDUFAF3,DALRD3,MIR191</i> |
| 14 | <i>BSN</i>                   |
| 15 | <i>ETV5,ETV5-AS1</i>         |
| 16 | <i>THAP9,LIN54</i>           |
| 17 | <i>NKX6-1</i>                |
| 18 | <i>DSPP,RP11-742B18.1</i>    |
| 19 | <i>LARS</i>                  |
| 20 | <i>CTB-78H18.1</i>           |
| 21 | <i>HLA-B</i>                 |
| 22 | <i>DOM3Z,STK19</i>           |
| 23 | <i>FGD2</i>                  |
| 24 | <i>SOGA3</i>                 |
| 25 | <i>HGC6.3,RP3-470B24.5</i>   |
| 26 | <i>FAM120B</i>               |
| 27 | <i>NACAD</i>                 |
| 28 | <i>MUC12</i>                 |
| 29 | <i>KRBA1</i>                 |
| 30 | <i>FAM21A,FAM21B</i>         |
| 31 | <i>ADM,CAND1.11</i>          |
| 32 | <i>CAPN5</i>                 |
| 33 | <i>GAB2</i>                  |
| 34 | <i>CEP164</i>                |
| 35 | <i>WNK1</i>                  |
| 36 | <i>PRMT8</i>                 |
| 37 | <i>KRT6B</i>                 |
| 38 | <i>OR6C65</i>                |

|    |                                 |
|----|---------------------------------|
| 39 | <i>ORC76</i>                    |
| 40 | <i>MYRFL</i>                    |
| 41 | <i>ZFC3H1</i>                   |
| 42 | <i>LRRIQ1</i>                   |
| 43 | <i>DEPDC4,SCYL2</i>             |
| 44 | <i>WDFY2</i>                    |
| 45 | <i>PCCA</i>                     |
| 46 | <i>TMCO3</i>                    |
| 47 | <i>HOMEZ,RP11-124D2.6</i>       |
| 48 | <i>PLEKHH1</i>                  |
| 49 | <i>BTBD7</i>                    |
| 50 | <i>CCNK</i>                     |
| 51 | <i>AHNAK2</i>                   |
| 52 | <i>FMN1</i>                     |
| 53 | <i>GOLGA8B,GOLGA8A</i>          |
| 54 | <i>TFAP4</i>                    |
| 55 | <i>CBFA2T3,RP11-830F9.6</i>     |
| 56 | <i>SEZ6,PIPOX</i>               |
| 57 | <i>CCL4L1,CCL4L2</i>            |
| 58 | <i>RAB40B</i>                   |
| 59 | <i>POTEC</i>                    |
| 60 | <i>SETBP1</i>                   |
| 61 | <i>ZBTB7C</i>                   |
| 62 | <i>FUT3</i>                     |
| 63 | <i>NDUFA11,FUT5,AC024592.12</i> |
| 64 | <i>DMKN</i>                     |
| 65 | <i>DIDO1</i>                    |
| 66 | <i>LSS,AP001468.1</i>           |
| 67 | <i>TPST2</i>                    |

---

**Supplemental Table S2. Primary antibodies.**

| No | Antibody                                                                             |
|----|--------------------------------------------------------------------------------------|
| 1  | phosphorylated tau (AT8; Thermo Scientific, Waltham, MA, USA; 1:200)                 |
| 2  | phosphorylated $\alpha$ -synuclein (pSyn#64; Wako, Tokyo, Japan; 1:1,000)            |
| 3  | bassoon (SAP7F407; Abcam, Cambridge, UK; 1:150)                                      |
| 4  | polyglutamine (5TF1-1C2; Merck Millipore, Darmstadt, Germany; 1:10,000)              |
| 5  | rabbit polyclonal anti- $\beta$ -amyloid (4G8; BioLegend, San Diego, CA, USA; 1:500) |
| 6  | phosphorylated TDP-43 (pS409/410-2; Cosmo Bio, Tokyo, Japan; 1:5,000)                |
| 7  | FUS (SIGMA, St. Louis, MO, USA; 1:2,000)                                             |
| 8  | three-repeat tau (RD3; Millipore, Billerica, USA, monoclonal; 1:500)                 |
| 9  | four-repeat tau (RD4; Millipore; 1:100)                                              |
| 10 | tau monoclonal antibody (T46) (1:1000)                                               |
| 11 | HSP90 (BD, 610418; 1:2000)                                                           |
| 12 | GAPDH (Ambion; 1:2000)                                                               |
| 13 | c-Myc (Wako; 1:1000)                                                                 |
| 14 | GFP (Wako; 1:1000)                                                                   |

**Supplemental Table S3. Primers used in this study.**

| Primer # | Chrom | Pos GRCh37 | -200 bp  | +200 bp  | Mutation              | dbSNP ID    | Forward               |     |      | Reverse               |     |      | Product size (bp) | Position                               |
|----------|-------|------------|----------|----------|-----------------------|-------------|-----------------------|-----|------|-----------------------|-----|------|-------------------|----------------------------------------|
|          |       |            |          |          |                       |             | Sequence (5' → 3')    | LEN | Tm   | Sequence (5' → 3')    | LEN | Tm   |                   |                                        |
| 1        | 3     | 49698714   | 49698514 | 49698914 | c.9436 C>T, p.R3146C  | rs201112949 | AGGCCACTATGCAGGCCAAA  | 20  | 62.2 | GGACCTTGCCCTGCTCATAG  | 20  | 60.2 | 239               | <a href="#">chr3:49698623+49698861</a> |
| 2        | 3     | 49695553   | 49695353 | 49695753 | c.8564 C>T, p.P2855L  |             | GCTGAACAAAGCTCACGTGAG | 21  | 60.1 | CCTGTTCCCATACCTGGCTAC | 21  | 59.9 | 206               | <a href="#">chr3:49695437+49695642</a> |
| 3        | 3     | 49700471   | 49700271 | 49700671 | c.10880 G>T, p.G3627V | rs200611323 | ACGGACTGGTTTGATAAGCCC | 21  | 60.3 | CATAGCTGGAGCAGAGCTGG  | 20  | 60.2 | 333               | <a href="#">chr3:49700332+49700664</a> |
| 4        | 3     | 49701307   | 49701107 | 49701507 | c.11596C>G, p.P3866A  |             | GTTCTGTGTTGCAGCCACGG  | 20  | 62.4 | TTAGTGAGGGCATGCAGTGTG | 21  | 60.6 | 220               | <a href="#">chr3:49701206+49701425</a> |

Abbreviations: Chrom, chromosome; LEN, length; Tm, melting temperature; bp, base pairs; Pos, position

Supplemental Table S4. PCR method used in this study.

|                         |              |                                               |
|-------------------------|--------------|-----------------------------------------------|
| gDNA (25 ng/ $\mu$ L)   | 1 $\mu$ L    |                                               |
| GoTaq Green Master Mix  | 12.5 $\mu$ L | GoTaq Green Master Mix (Promega #M7122)       |
| Primer Mix (10 $\mu$ M) | 2.5 $\mu$ L  | Primer Mix = Forward+Reverse (each 5 $\mu$ M) |
| DDW                     | 9 $\mu$ L    |                                               |
| Total                   | 25 $\mu$ L   |                                               |

|      |       |     |
|------|-------|-----|
| 95°C | 2 min |     |
| 95°C | 30 s  |     |
| 60°C | 30 s  | ×32 |
| 72°C | 30 s  |     |
| 72°C | 5 min |     |
| 4°C  | ∞     |     |

**Supplemental Table S5. PCR primers for mutated rat bassoon cDNA**

|         |                                         |
|---------|-----------------------------------------|
| Forward | 5'-CAGTCAGCTCCAGGAGCTGCAGGGGCGAAGACT-3' |
| Reverse | 5'-AGTCTTCGCCCCTGCAGCTCCTGGAGCTGACTG-3' |

## References

1. Taniguchi-Watanabe, S. *et al.* Biochemical classification of tauopathies by immunoblot, protein sequence and mass spectrometric analyses of sarkosyl-insoluble and trypsin-resistant tau. *Acta Neuropathol.* **131**, 267-280 (2016).
2. Zhang, H. X., Tanji, K., Mori, F. & Wakabayashi, K. Epitope mapping of 2E2-D3, a monoclonal antibody directed against human TDP-43. *Neurosci. Lett.* 434, 170-174 (2008).
